# Supplementary material for: Simplexins P–S, Eunicellin-Based Diterpenes from the Soft Coral Klyxum simplex
Source: MDPI journal article supplement (doi:10.3390/md10061203), 2012-05-25
Supplement: s1 [file s1]

# **Simplexins P–S, Eunicellin-Based Diterpenes from the Soft Coral *Klyxum simplex***

Shwu-Li Wu,<sup>1,2</sup> Jui-Hsin Su,<sup>3,4</sup> Chiung-Yao Huang,<sup>1</sup> Chi-Jen Tai,<sup>1</sup> Ping-Jyun Sung,<sup>3,4</sup> Chih-Chung Liaw,<sup>1</sup> and Jyh-Horng Sheu<sup>\*1,5</sup>

<sup>1</sup> Department of Marine Biotechnology and Resources, National Sun Yat-sen University, Kaohsiung 804, Taiwan

<sup>2</sup> Center of General Studies, National Kaohsiung Marine University, Kaohsiung 811, Taiwan

<sup>3</sup> National Museum of Marine Biology & Aquarium, Pingtung 944, Taiwan;

<sup>4</sup> Graduate Institute of Marine Biotechnology, National Dong Hwa University, Pingtung 944, Taiwan

<sup>5</sup> Division of Marine Biotechnology, Asia-Pacific Ocean Research Center, National Sun Yat-sen University, Kaohsiung 804, Taiwan

\*To whom correspondence should be addressed. Tel.: 886-7-5252000 ext. 5030, Fax: 886-7-5255020. E-mail: sheu@mail.nsysu.edu.tw

**For compound 1:**

**Figure S1-1.**  $^1\text{H}$  NMR spectrum (500 MHz) of compound **1** in  $\text{CDCl}_3$ .

**Figure S1-2.**  $^{13}\text{C}$  NMR spectrum (125 MHz) of compound **1** in  $\text{CDCl}_3$ .

**For compound 2:**

**Figure S2-1.**  $^1\text{H}$  NMR spectrum (500 MHz) of compound **2** in  $\text{CDCl}_3$ .

**Figure S2-2.**  $^{13}\text{C}$  NMR spectrum (125 MHz) of compound **2** in  $\text{CDCl}_3$ .

**For compound 3:**

**Figure S3-1.**  $^1\text{H}$  NMR spectrum (500 MHz) of compound **3** in  $\text{CDCl}_3$ .

**Figure S3-2.**  $^{13}\text{C}$  NMR spectrum (125 MHz) of compound **3** in  $\text{CDCl}_3$ .

**For compound 4:**

**Figure S4-1.**  $^1\text{H}$  NMR spectrum (500 MHz) of compound **4** in  $\text{CDCl}_3$ .

**Figure S4-2.**  $^{13}\text{C}$  NMR spectrum (125 MHz) of compound **4** in  $\text{CDCl}_3$ .

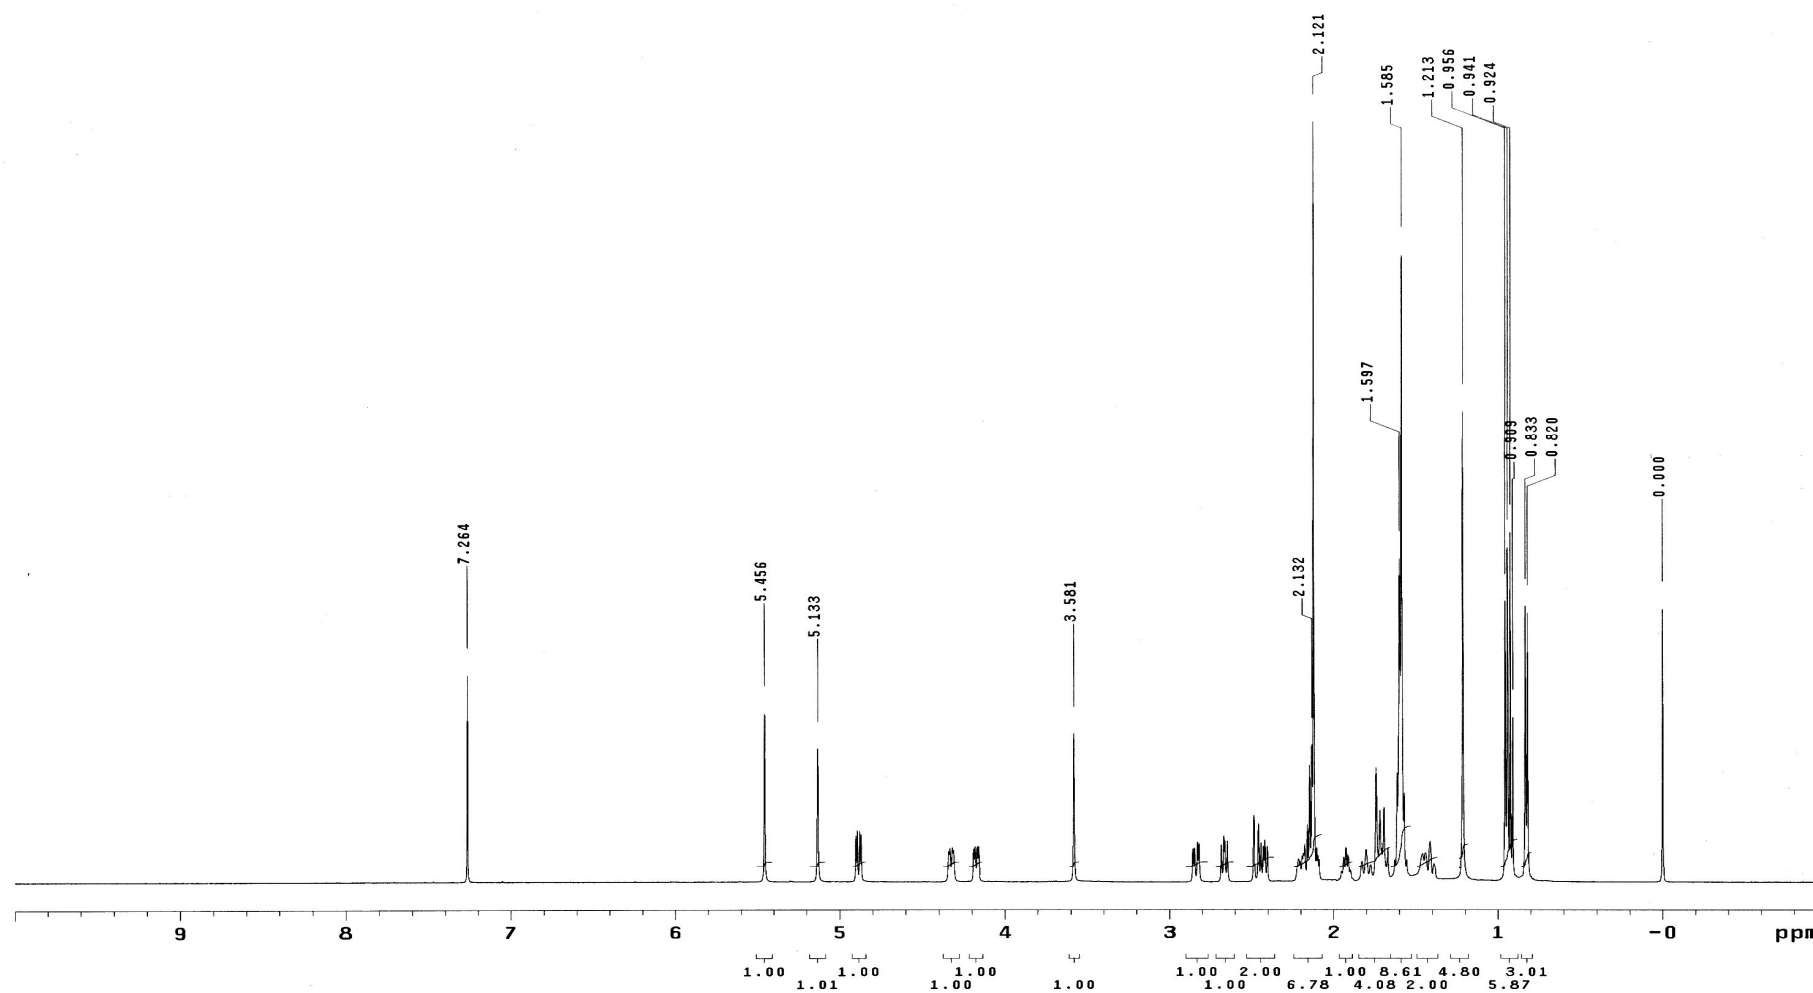

**Figure S1-1.** <sup>1</sup>H NMR spectrum (500 MHz) of compound **1** in CDCl<sub>3</sub>.

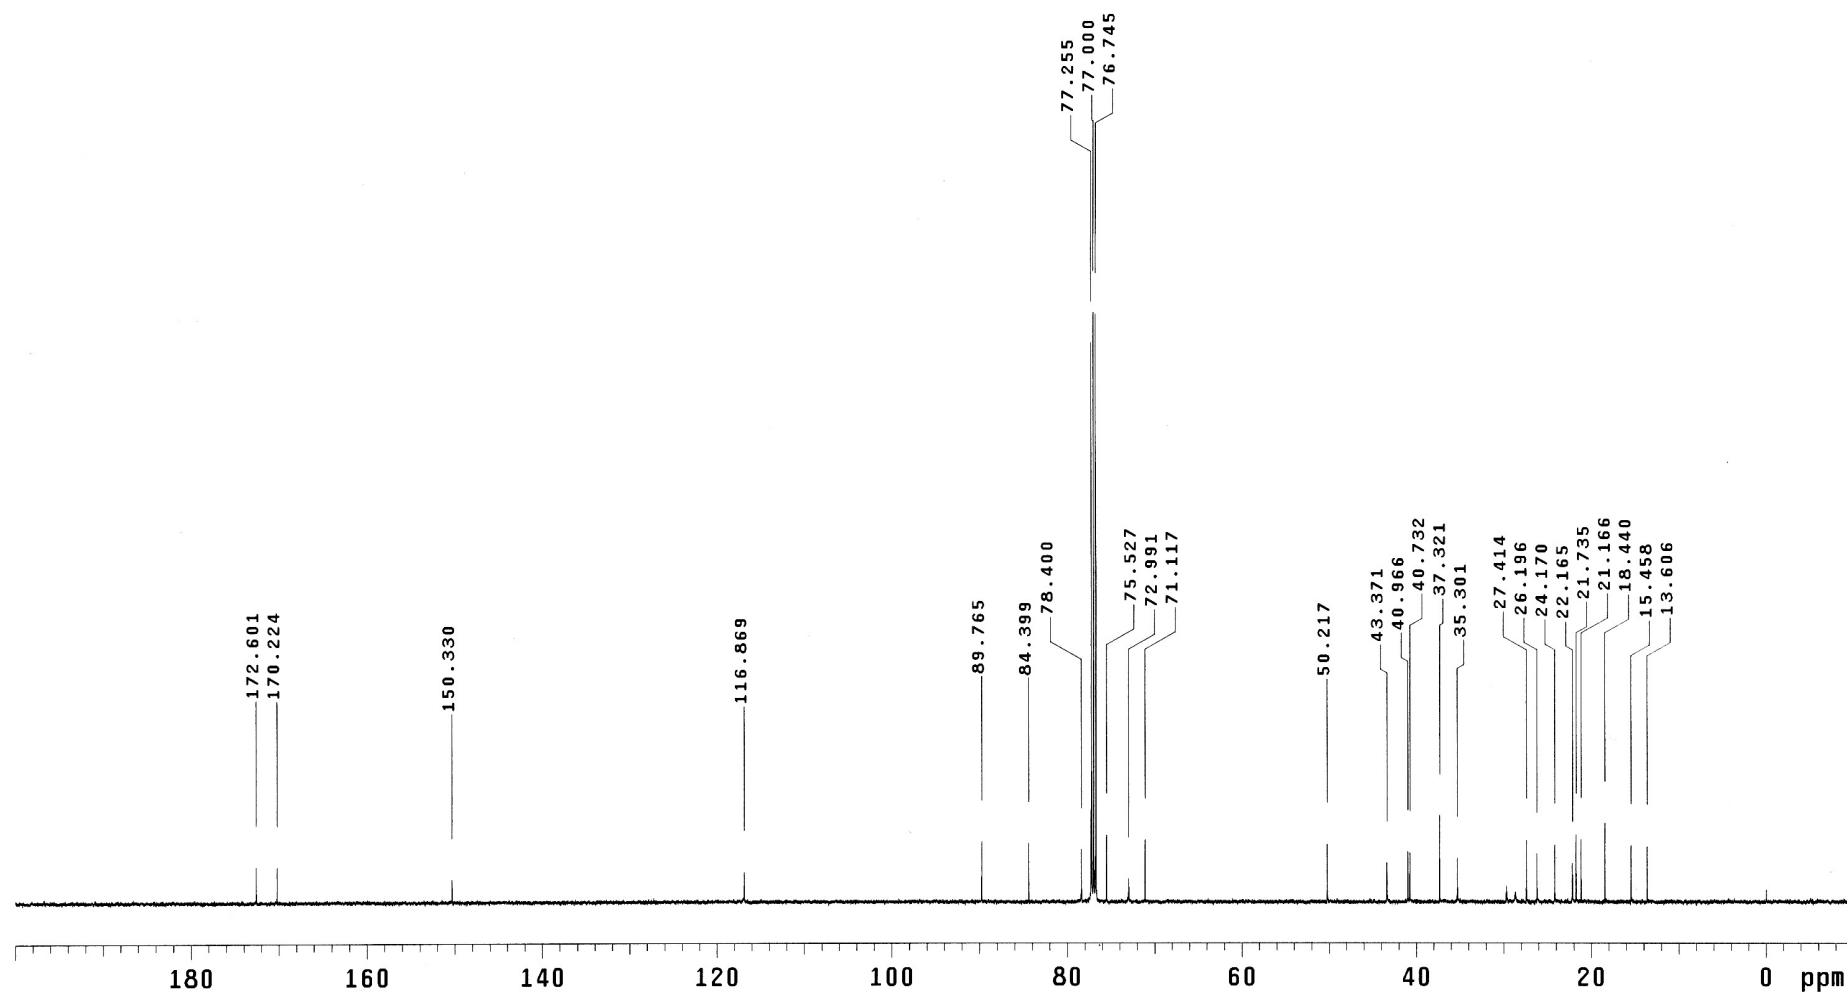

Figure S1-2. <sup>13</sup>C NMR spectrum (125 MHz) of compound **1** in CDCl<sub>3</sub>.

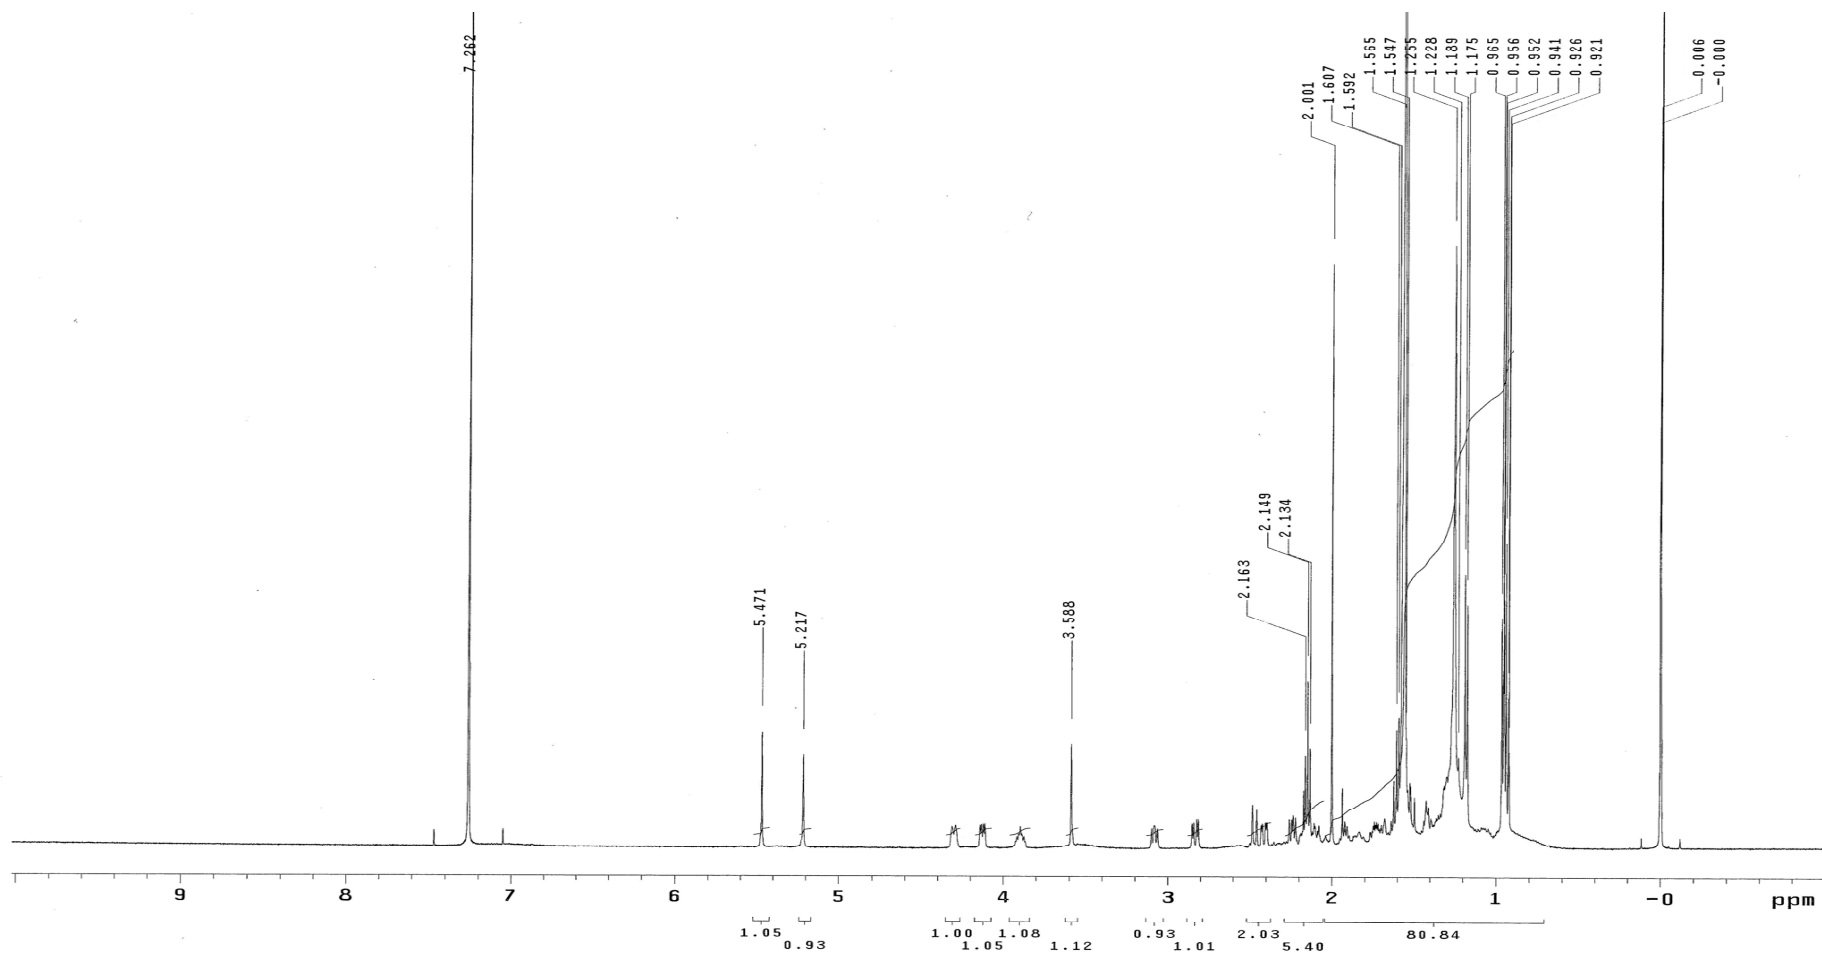

**Figure S2-1.** <sup>1</sup>H NMR spectrum (500 MHz) of compound **2** in CDCl<sub>3</sub>.

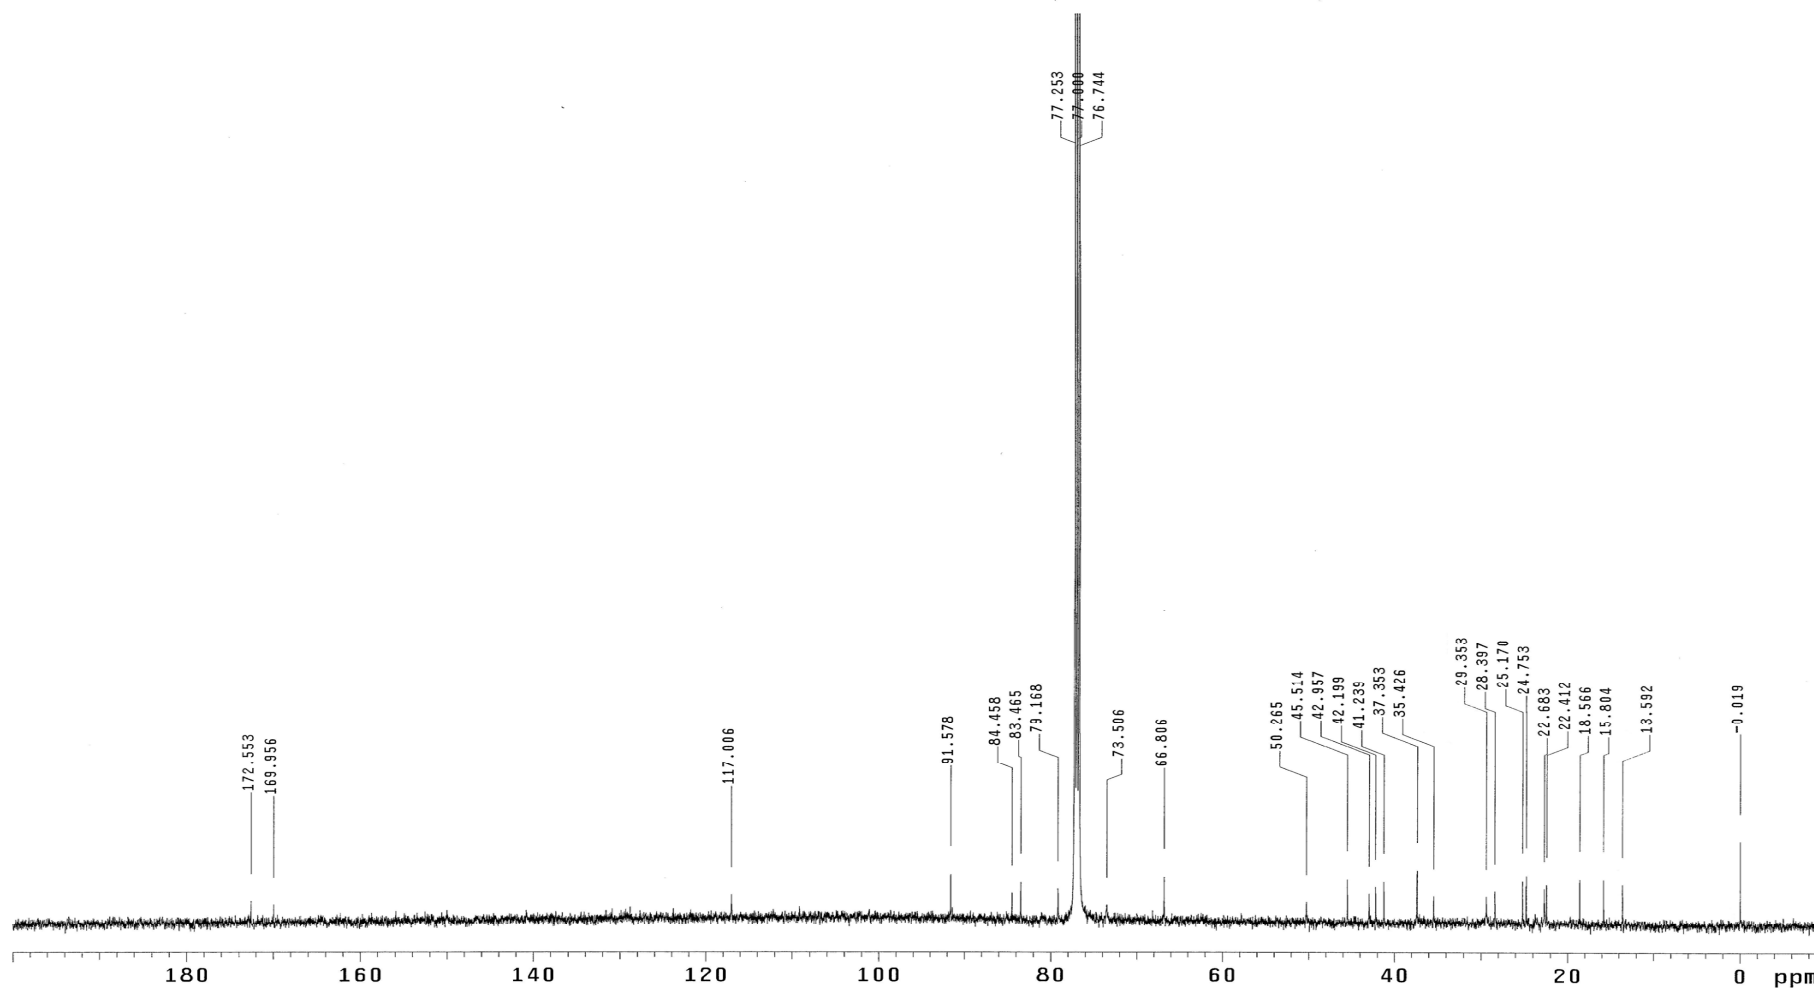

**Figure S2-2.** <sup>13</sup>C NMR spectrum (125 MHz) of compound **2** in CDCl<sub>3</sub>.

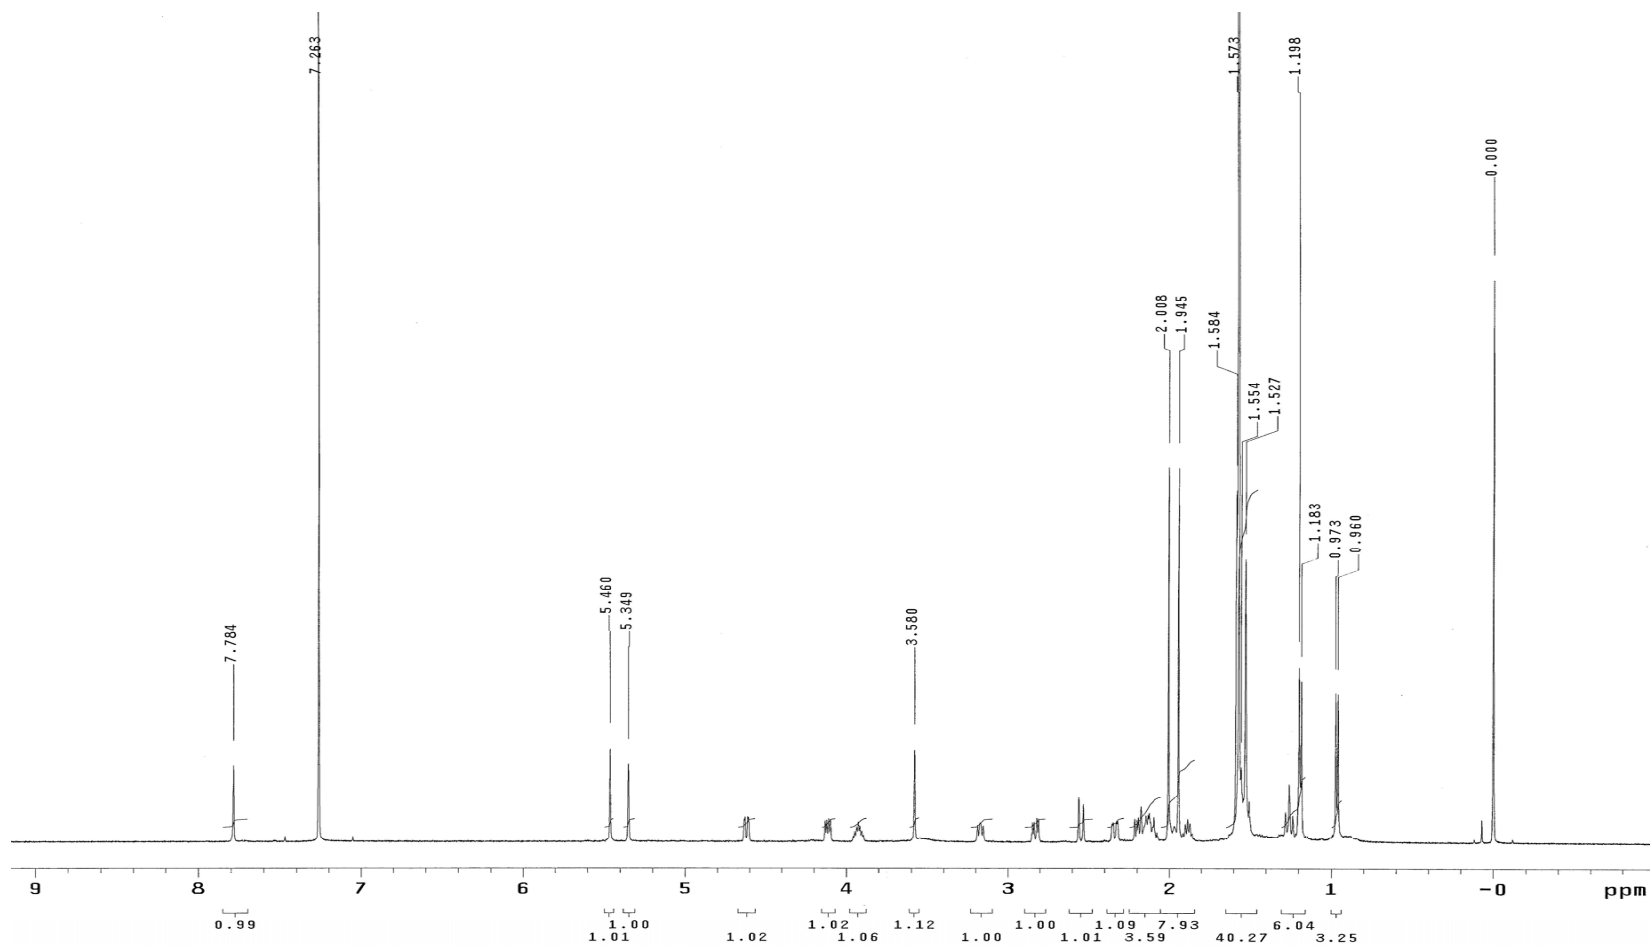

**Figure S3-1.** <sup>1</sup>H NMR spectrum (500 MHz) of compound **3** in CDCl<sub>3</sub>.

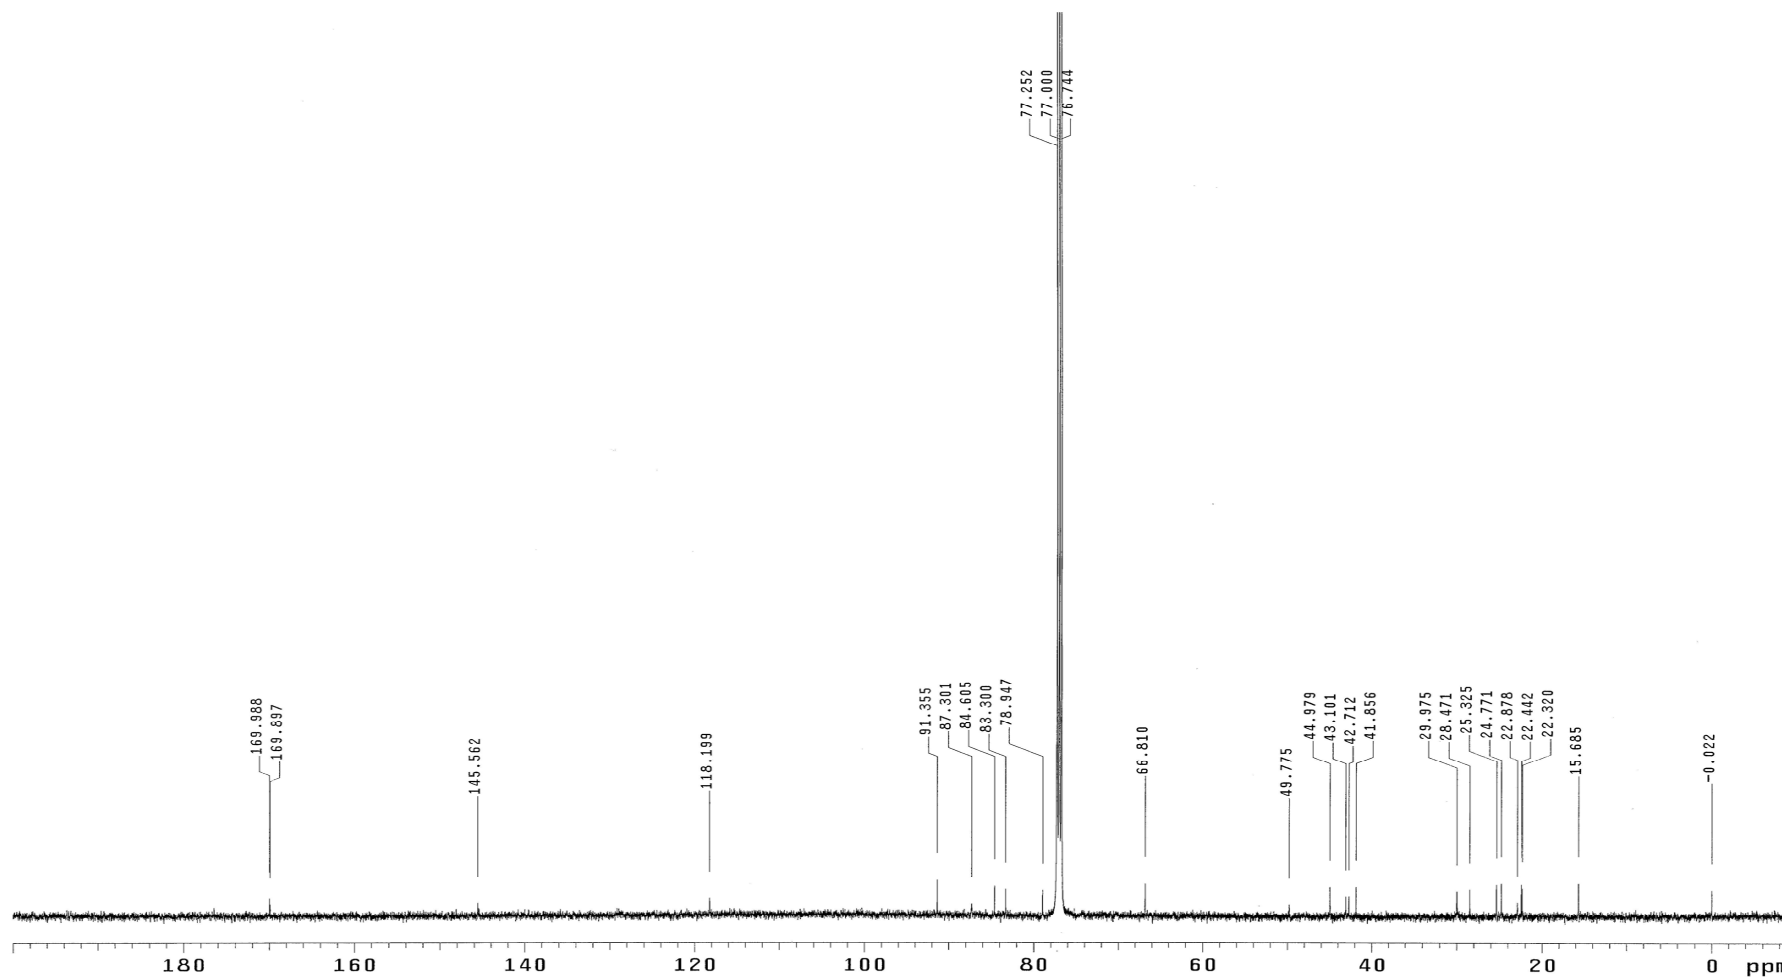

**Figure S3-2.** <sup>13</sup>C NMR spectrum (125 MHz) of compound **3** in CDCl<sub>3</sub>.



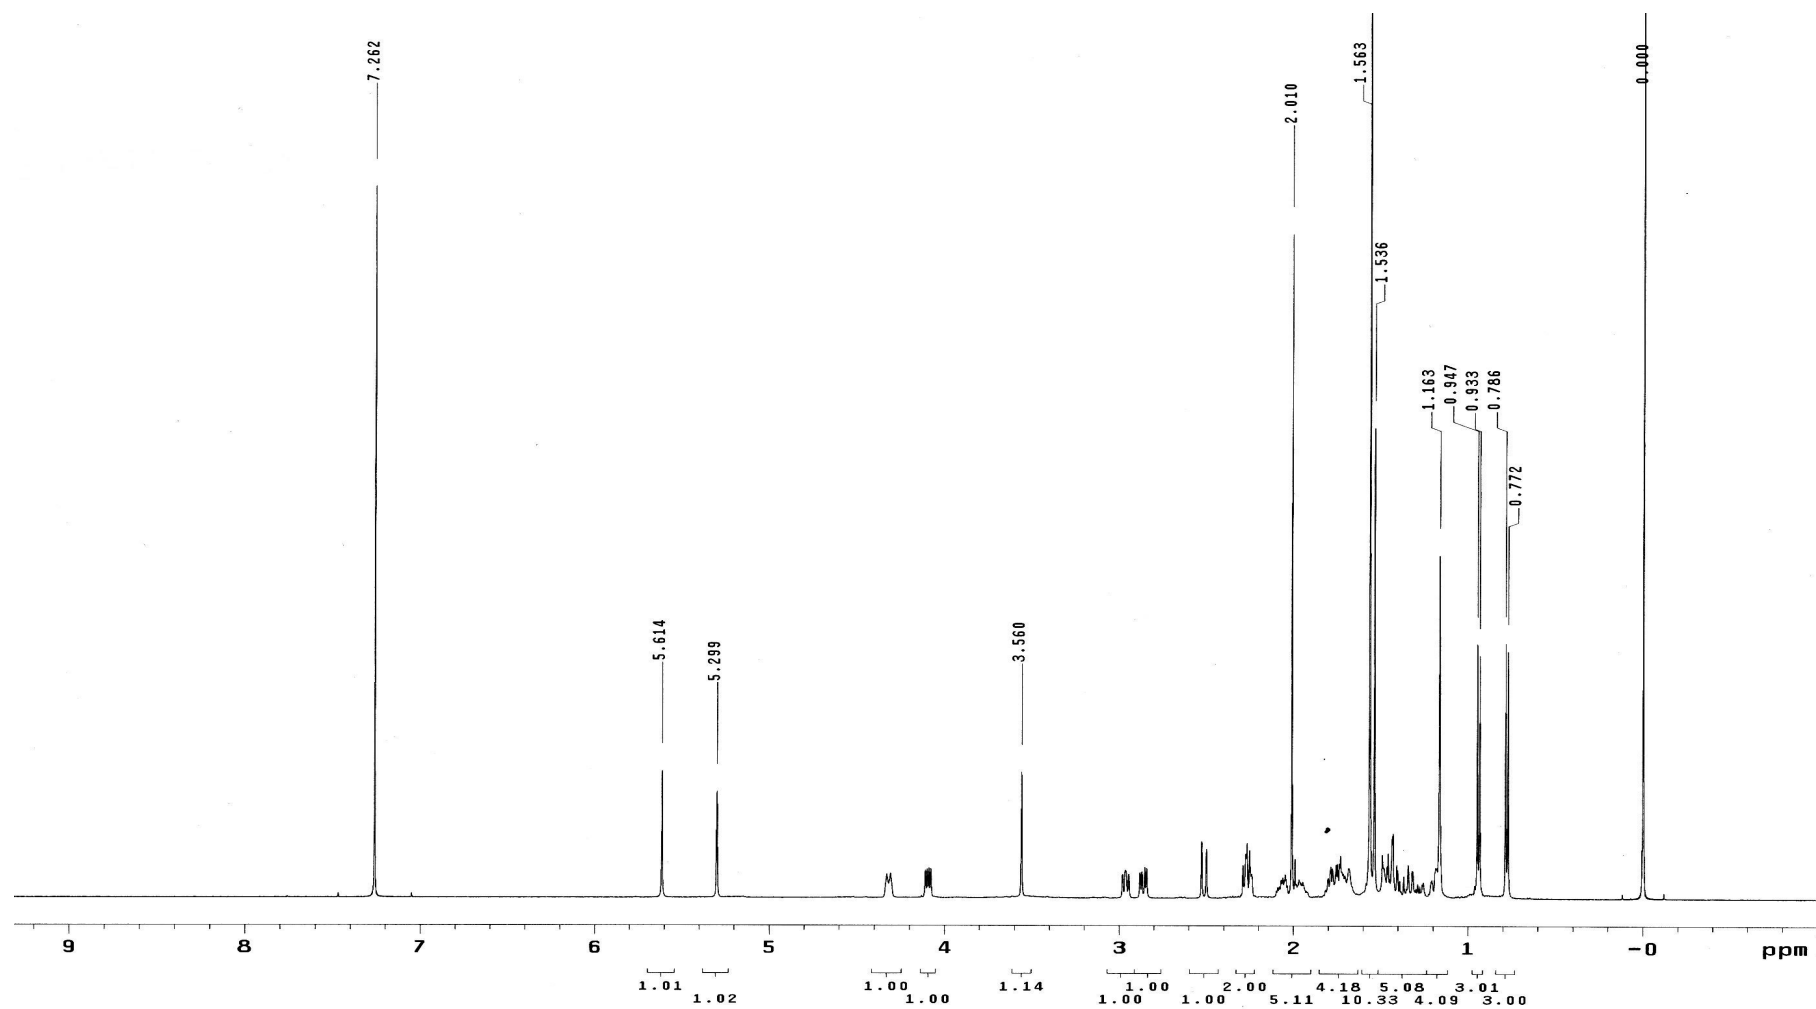

Figure S4-1. <sup>1</sup>H NMR spectrum (500 MHz) of compound 4 in CDCl<sub>3</sub>.

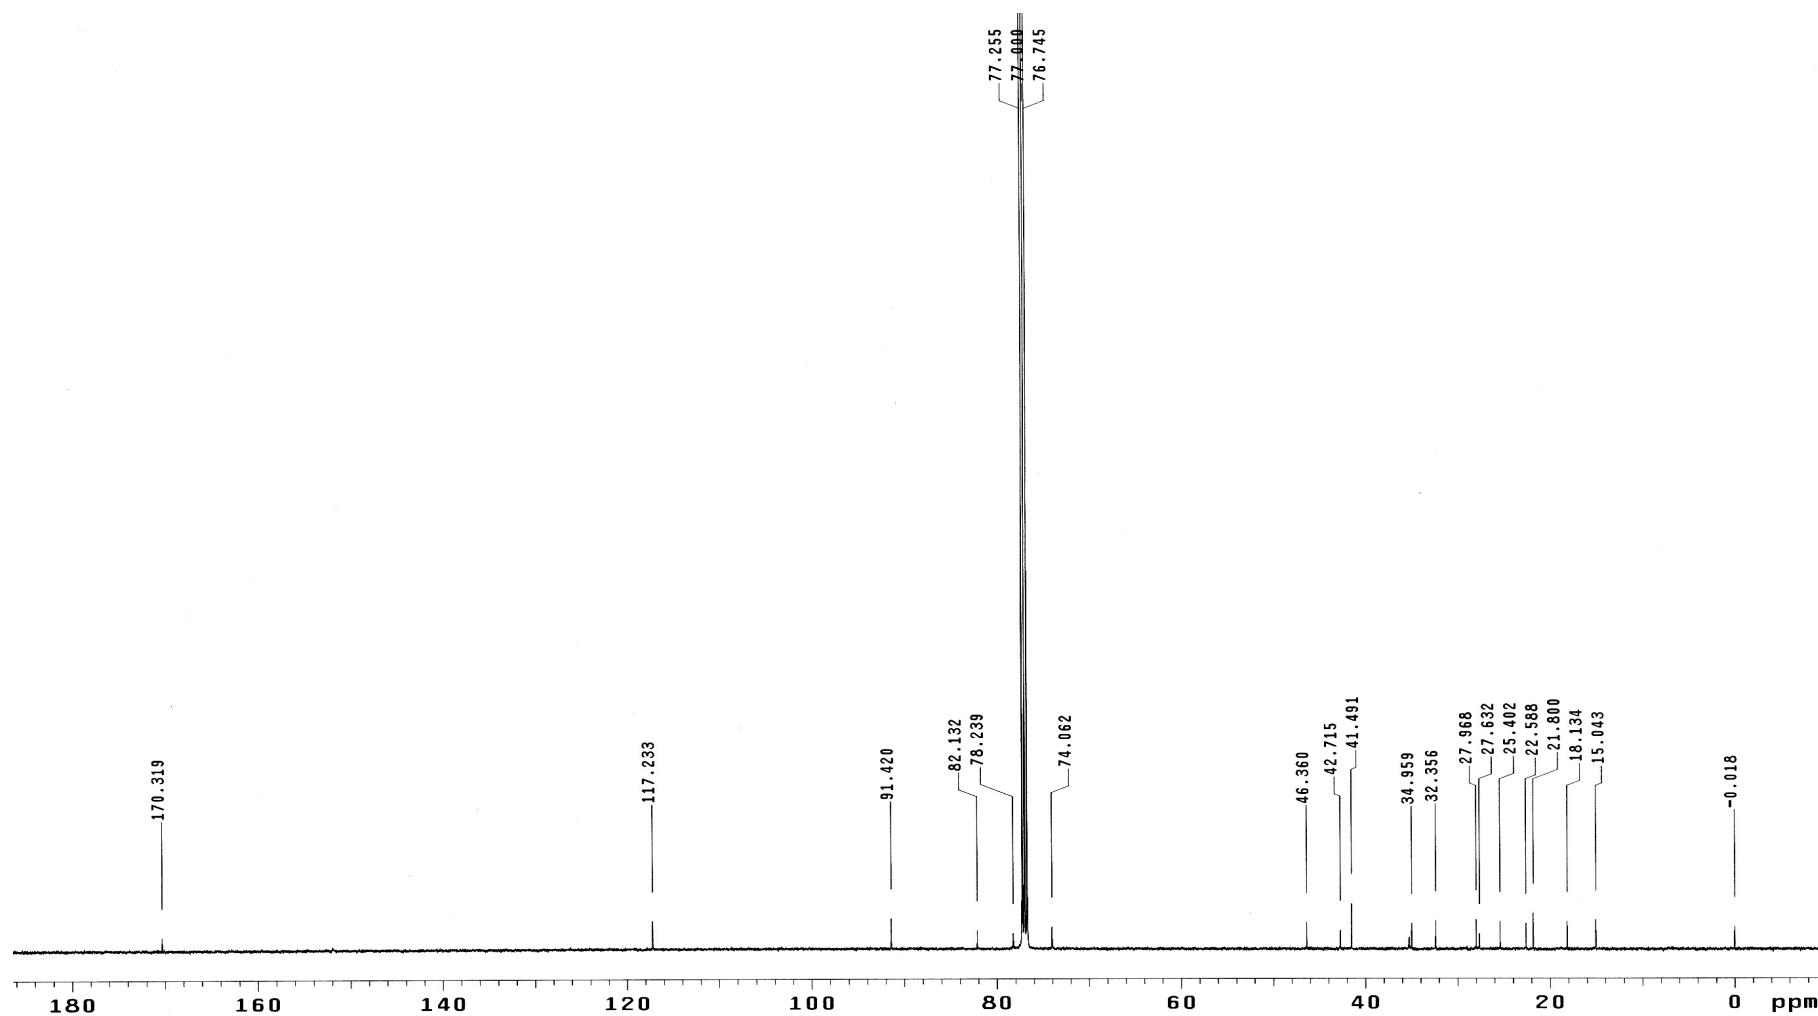

Figure S4-2. <sup>13</sup>C NMR spectrum (125 MHz) of compound **4** in CDCl<sub>3</sub>.
